# Supplementary material for: Collagen reorganization at the tumor-stromal interface facilitates local invasion
Source: PubMed Central journal article supplement (PMC1781458; doi:10.1186/1741-7015-4-38), 2006-12-26
Supplement: 1741-7015-4-38-S2.pdf [file 1741-7015-4-38-S2.pdf]

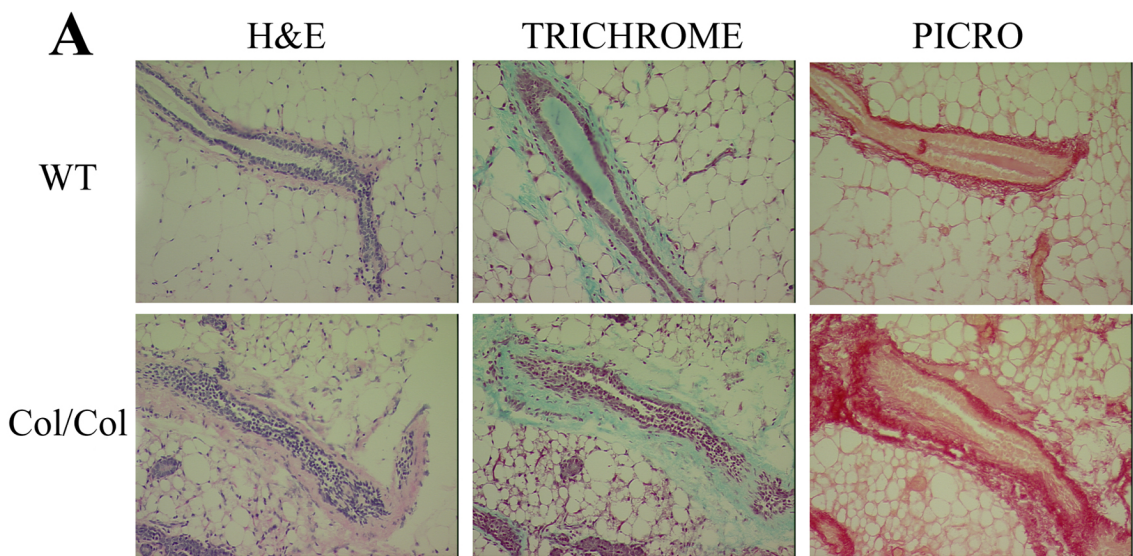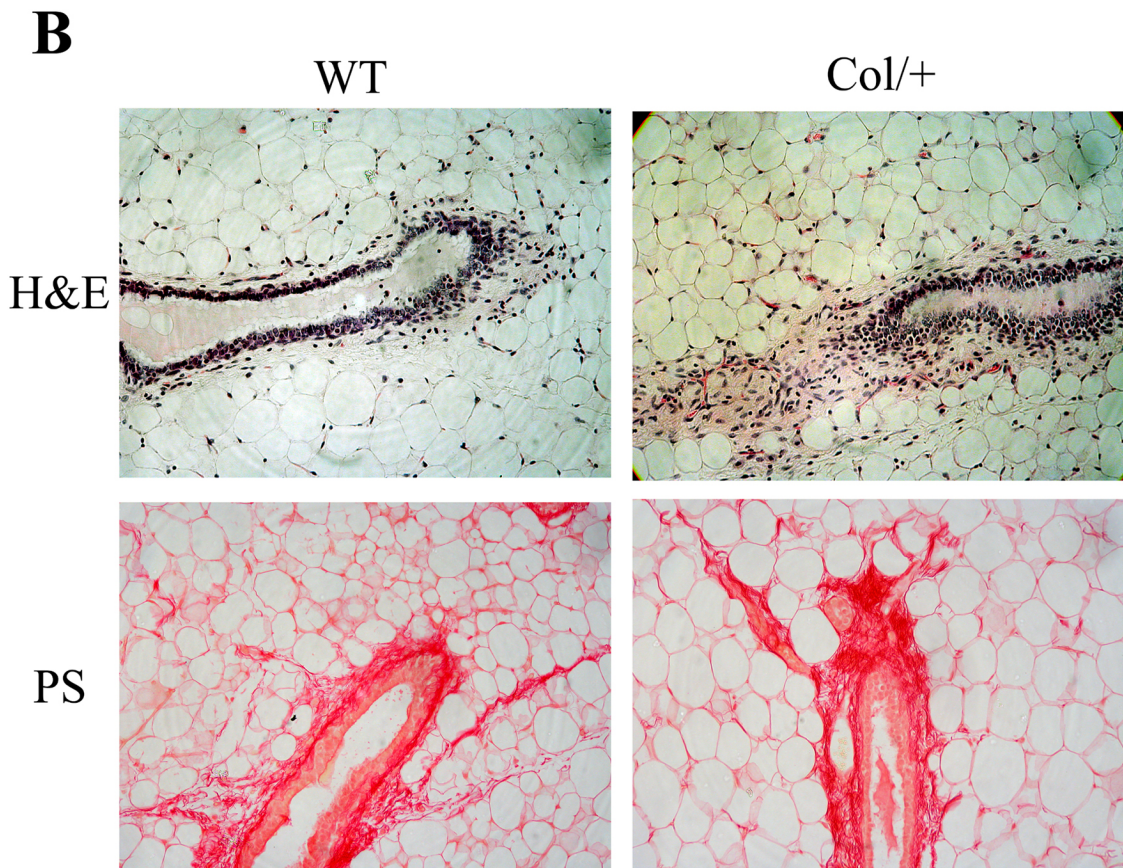

Supplementary Figure 2: *Col1a1<sup>tmJae</sup>* mice possess collagen dense mammary tissue. Histology of homozygous *col1a1* mice (A) showing increased collagen surrounding the mammary duct as detected with H&E, trichrome, and picrosirius red (Picro) staining. (B) Increased collagen is also present in heterozygous *col1a1* mice as detected with H&E and picrosirius red staining (PS).
